# Supplementary material
Source: Springer Nature journal article supplement (https://www.springermedizin.de/resource/supplementary/12888_2012_1263_MOESM2_ESM.pdf/9480536)

## Positive symptoms

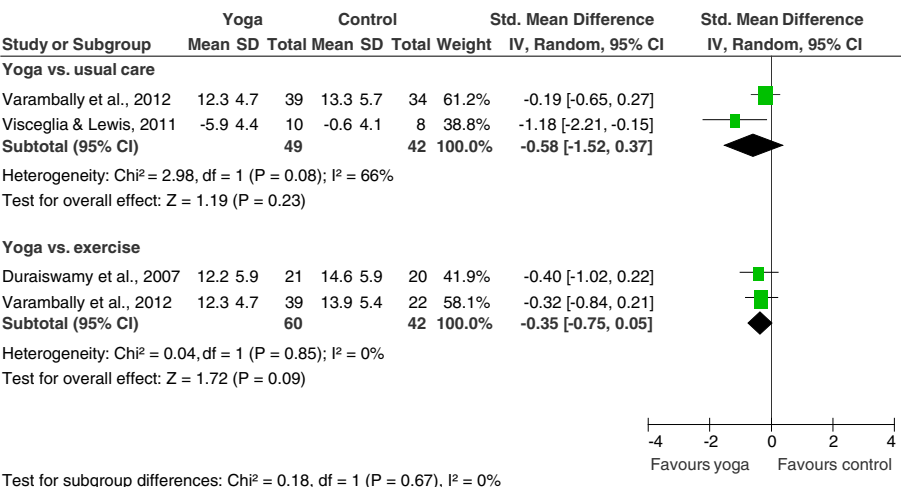

## Negative symptoms

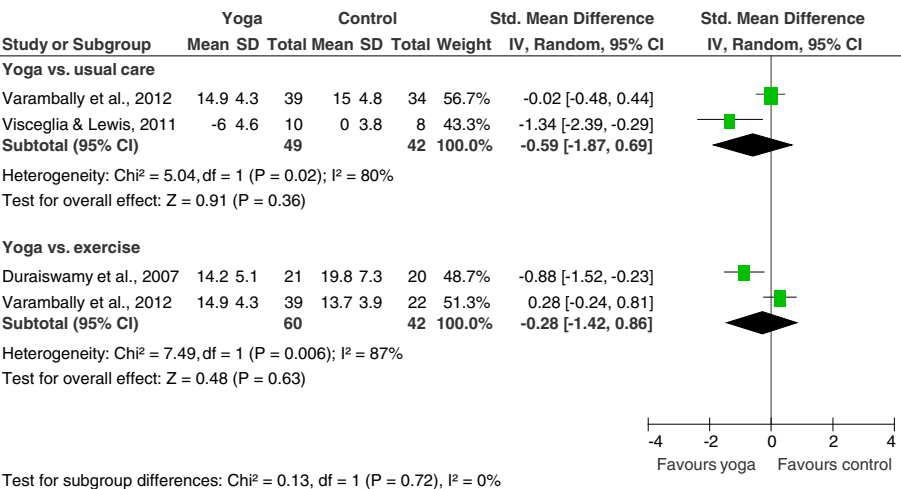

## Quality of life

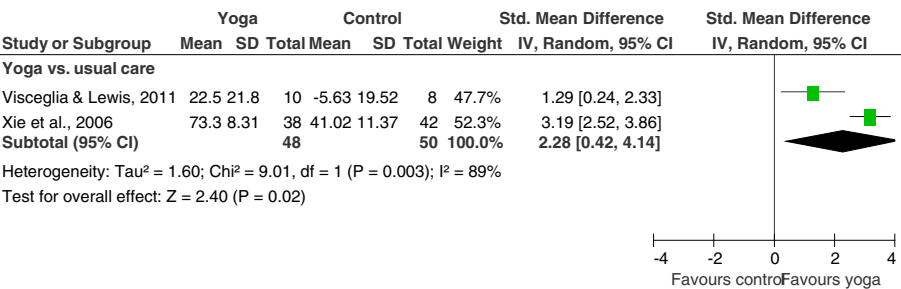

Supplement: MOESM2 [file 9480536]
